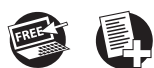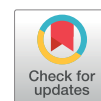

# Much to HAPO FUS About: Increasing Maternal Glycemia in Pregnancy Is Associated With Worsening Childhood Glucose Metabolism

Florence M. Brown,<sup>1,2,3</sup>  
Elvira Isganaitis,<sup>1,3</sup> and  
Tamarra James-Todd<sup>3,4,5</sup>

*Diabetes Care* 2019;42:393–395 | <https://doi.org/10.2337/dci18-0064>

The initial purpose of the Hyperglycemia and Adverse Pregnancy Outcome (HAPO) study was to examine the associations of increasing degrees of untreated maternal glycemia, less severe than overt diabetes, with adverse pregnancy and neonatal outcomes and bring a unified approach to the diagnosis of gestational diabetes mellitus (GDM).

The HAPO study (1) demonstrated linear increases in the risk of the primary outcomes of neonatal birth weight, cord C-peptide >90th percentile, neonatal hypoglycemia, and primary cesarean delivery with increasing maternal glycemia on a one-step 75-g 2-h oral glucose tolerance test (OGTT). The secondary outcomes including neonatal skinfold thicknesses >90th percentile, preterm delivery, preeclampsia, and shoulder dystocia had similar associations. In two long-term offspring follow-up studies published in this issue of *Diabetes Care* (2,3), risks of adverse outcomes related to this continuum of maternal glycemia in pregnancy are now demonstrated to persist into early adolescence.

The long-term risk of maternal hyperglycemia to the offspring exposed in utero has been an ongoing concern for decades. In 1954, Pedersen (4) proposed

that excessive glucose in mothers with diabetes is available for trans-placental passage, resulting in fetal hyperinsulinemia and excess fat accretion. In his Banting lecture, Norbert Freinkel (5) proposed the concept that fetal exposures to altered levels of maternal fuels, after organogenesis, may result in long-range adverse anatomical and metabolic changes in the offspring, which he called “fuel-mediated teratogenesis.” A related “fetal programming” hypothesis proposed by Barker and Osmond (6) holds that nutritional (and other environmental) exposures during critical developmental windows may induce changes in tissue development and function that contribute to long-term chronic disease risk. Based on studies in animal models and in human tissues, such long-term effects may be mediated through epigenetic changes in the  $\beta$ -cells, liver, and insulin target tissues, along with hypothalamic appetite signaling, the gut microbiome, plasma metabolites, and other factors (7,8). However, reviews and systematic analyses of human data (9–12) have demonstrated inconsistent long-term offspring outcomes, which may be due to variable adjustment for important confounders such as maternal

and paternal BMI and glycemia (9,13), the inability to ascertain effects of GDM treatment (12), and the study of special populations with high prevalence of type 2 diabetes and GDM, which might not be generalizable (14). Thus, there is a critical knowledge gap regarding long-term health outcomes in the offspring of women with gradations of glucose intolerance in pregnancy.

The two articles herein examine the associations of untreated maternal plasma glucose on the one-step 75-g OGTT at 24–32 weeks of gestation with markers of glucose metabolism in 4,160 racially/ethnically diverse offspring at 10–14 years of age (2,3). The article by Lowe et al. (2) focuses on untreated maternal GDM (based on post hoc International Association of the Diabetes and Pregnancy Study Groups/World Health Organization criteria) (15,16) as the primary exposure, with comprehensive markers of offspring metabolic outcomes including impaired fasting glucose (IFG); impaired glucose tolerance (IGT); 75-g OGTT glucose values at 0, 30 min, 1 h, and 2 h; A1C; type 2 diabetes; insulin sensitivity (Matsuda index [IS]) and secretion (insulinogenic index); and the oral disposition index (oDI), a measure

<sup>1</sup>Joslin Diabetes Center, Boston, MA

<sup>2</sup>Division of Endocrinology, Diabetes and Metabolism, Beth Israel Deaconess Medical Center, Boston, MA

<sup>3</sup>Harvard Medical School, Boston, MA

<sup>4</sup>Division of Women’s Health, Department of Medicine, Brigham and Women’s Hospital, Boston, MA

<sup>5</sup>Departments of Environmental Health and Epidemiology, Harvard T.H. Chan School of Public Health, Boston, MA

Corresponding author: Florence M. Brown, [florence.brown@joslin.harvard.edu](mailto:florence.brown@joslin.harvard.edu)

This article is part of a special article collection available at <http://care.diabetesjournals.org/gdm-new-evidence>.

© 2019 by the American Diabetes Association. Readers may use this article as long as the work is properly cited, the use is educational and not for profit, and the work is not altered. More information is available at <http://www.diabetesjournals.org/content/license>.

See accompanying articles, pp. 372 and 381.

of  $\beta$ -cell compensation for insulin resistance and a strong predictor of type 2 diabetes (17). The article by Scholtens et al. (3) examines associations between in utero exposure to maternal glucose across the spectrum, both continuous associations of maternal glucose and categorical associations across five maternal ranges for glucose, and offspring markers of glucose metabolism.

In the article by Lowe et al. (2), offspring of mothers with GDM had higher prevalence of IGT; higher 30-min, 1-h, and 2-h glucose during OGTT; and reduced IS and oDI compared with children of mothers without GDM. GDM in mothers was not associated with IFG or type 2 diabetes in offspring. In the article by Scholtens et al. (3), the authors demonstrate strong positive associations between maternal continuous and categorical glycemia status with offspring 75-g OGTT glucose, A1C, IGT, and IFG, along with inverse associations with IS and oDI. Maternal fasting plasma glucose (FPG) was positively associated with offspring FPG, IFG, and A1C and inversely associated with offspring IS. Moreover, maternal 1-h and 2-h glucose levels were positively associated with offspring IGT, A1C, and glucose levels during OGTT and inversely related to offspring IS and oDI. Strengthening the findings, multiple models were presented to address potential confounders, including field center (a proxy for race/ethnicity); child age, sex, pubertal status, and family history of diabetes in a first-degree relative; maternal factors (e.g., age, height, blood pressure, parity, smoking, and drinking); and both maternal BMI and child BMI z score. Notably, adjustments for maternal BMI, child BMI, and family history of diabetes did not alter the associations. Recognizing that associations may differ by pubertal status (18), the authors stratified by Tanner stage. While many of the continuous associations of maternal and child outcome were significant upon stratification by Tanner 1, Tanner 2–3, and Tanner 4–5, the authors note that statistical models were not powered for all of the associations.

These studies indicate strong continuous associations between maternal glycemia in pregnancy and long-term effects on offspring glycemia, insulin sensitivity, and  $\beta$ -cell function. As a note of caution, the studies found effects on offspring risk of IGT and in some

analyses IFG but did not show a significant increase in risk of type 2 diabetes with increasing maternal hyperglycemia. However, type 2 diabetes is rare in children, and the study was likely underpowered to look at this outcome. Still, in youth, these diagnostic categories are fluid. A recent study from Galderisi et al. (19) showed that 65% of adolescents (mean age 12.7 years) with IGT at baseline reverted to normal glucose tolerance at follow-up (mean 2.9 years), but notably 8% did progress to type 2 diabetes during this short time period. While these associations do not prove causality, they do give cause for concern. In the search for markers that identify children at risk for abnormal glucose metabolism, maternal glycemia in utero may be among the earliest. Of importance, the nature of these associations shows that risks are continuous and may argue for broader use of the one-step 75-g OGTT to diagnose GDM to identify children with higher risks of abnormal glucose metabolism in early adolescence.

Further studies are needed to evaluate whether treatment of women with higher glucose levels in pregnancy will reduce or reverse abnormal glucose metabolism in offspring. The optimal time period(s) to intervene to reduce offspring metabolic risk needs further study (i.e., treatment of pregnant mothers, treatment of affected infants, children, or youth, or a multifaceted approach). Other possible mechanisms should be studied to assess their possible contribution to offspring metabolic outcomes in relation to maternal hyperglycemia, including shared genetics, shared environment—similar diets and exercise patterns as well as chemical exposures (20)—and paternal effects (21,22). Still, with childhood obesity, metabolic disease, and type 2 diabetes being challenging conditions to treat successfully, any interventions that may prevent their emergence should be strongly considered by professional societies and clinicians. Finally, the continuum of increasing offspring metabolic risk associated with maternal hyperglycemia raises the question: What maternal glucose thresholds on the one-step 75-g OGTT should we use to identify offspring who are at greatest risk? Studies of cost-benefit and health economic impact will be necessary to answer this question.

The HAPO Follow-up Study (HAPO FUS) data presented in this issue of *Diabetes Care* (2,3) provides an additional strong argument for the need to derive and use diagnostic glucose levels in pregnancy based on the available science rather than history or common usage.

**Funding.** F.M.B. receives funding support from P30DK057521. E.I. receives funding support from P30DK057521, R21HD091974, U01DK061230, and the Peabody Foundation. T.J.-T. receives funding support from R01ES026166 and P30ES000002.

**Duality of Interest.** No potential conflicts of interest relevant to this article were reported.

## References

1. Metzger BE, Lowe LP, Dyer AR, et al.; HAPO Study Cooperative Research Group. Hyperglycemia and adverse pregnancy outcomes. *N Engl J Med* 2008;358:1991–2002
2. Lowe WL Jr, Scholtens DM, Kuang A, et al.; HAPO Follow-up Study Cooperative Research Group. Hyperglycemia and Adverse Pregnancy Outcome Follow-up Study (HAPO FUS): maternal gestational diabetes mellitus and childhood glucose metabolism. *Diabetes Care* 2019;42:372–380
3. Scholtens DM, Kuang A, Lowe LP, et al.; HAPO Follow-up Study Cooperative Research Group. Hyperglycemia and Adverse Pregnancy Outcome Follow-up Study (HAPO FUS): maternal glycemia and childhood glucose metabolism. *Diabetes Care* 2019;42:381–392
4. Pedersen J. Weight and length at birth of infants of diabetic mothers. *Acta Endocrinol (Copenh)* 1954;16:330–342
5. Freinkel N. Banting Lecture 1980: of pregnancy and progeny. *Diabetes* 1980;29:1023–1035
6. Barker DJ, Osmond C. Infant mortality, childhood nutrition, and ischaemic heart disease in England and Wales. *Lancet* 1986;1:1077–1081
7. Gingras V, Hivert MF, Oken E. Early-life exposures and risk of diabetes mellitus and obesity. *Curr Diab Rep* 2018;18:89
8. Chen P, Piaggi P, Traurig M, et al. Differential methylation of genes in individuals exposed to maternal diabetes in utero. *Diabetologia* 2017; 60:645–655
9. Donovan LE, Cundy T. Does exposure to hyperglycaemia in utero increase the risk of obesity and diabetes in the offspring? A critical reappraisal. *Diabet Med* 2015;32:295–304
10. Kim SY, England JL, Sharma JA, Njoroge T. Gestational diabetes mellitus and risk of childhood overweight and obesity in offspring: a systematic review. *Exp Diabetes Res* 2011;2011: 541308
11. Philipps LH, Santhakumaran S, Gale C, et al. The diabetic pregnancy and offspring BMI in childhood: a systematic review and meta-analysis. *Diabetologia* 2011;54:1957–1966
12. Kawasaki M, Arata N, Miyazaki C, et al. Obesity and abnormal glucose tolerance in offspring of diabetic mothers: a systematic review and meta-analysis. *PLoS One* 2018;13:e0190676

13. Morandi A, Meyre D, Lobbens S, et al. Estimation of newborn risk for child or adolescent obesity: lessons from longitudinal birth cohorts. *PLoS One* 2012;7:e49919
14. Pettitt DJ, Bennett PH, Knowler WC, Baird HR, Aleck KA. Gestational diabetes mellitus and impaired glucose tolerance during pregnancy. Long-term effects on obesity and glucose tolerance in the offspring. *Diabetes* 1985;34(Suppl. 2):119–122
15. International Association of Diabetes and Pregnancy Study Groups Consensus Panel. International Association of Diabetes and Pregnancy Study Groups recommendations on the diagnosis and classification of hyperglycemia in pregnancy. *Diabetes Care* 2010;33:676–682
16. Diagnostic criteria and classification of hyperglycaemia first detected in pregnancy: a World Health Organization guideline. *Diabetes Res Clin Pract* 2014;103:341–363
17. DeFronzo RA, Tripathy D, Schwenke DC, et al.; ACT NOW Study. Prediction of diabetes based on baseline metabolic characteristics in individuals at high risk. *Diabetes Care* 2013;36:3607–3612
18. Kelly LA, Lane CJ, Weigensberg MJ, Toledo-Corral CM, Goran MI. Pubertal changes of insulin sensitivity, acute insulin response, and  $\beta$ -cell function in overweight Latino youth. *J Pediatr* 2011;158:442–446
19. Galderisi A, Giannini C, Weiss R, et al. Trajectories of changes in glucose tolerance in a multiethnic cohort of obese youths: an observational prospective analysis. *Lancet Child Adolesc Health* 2018;2:726–735
20. Trasande L, Shaffer RM, Sathyanarayana S.; Council on Environmental Health. Food additives and child health [article online]. *Pediatrics* 2018. Available from <http://pediatrics.aappublications.org/content/142/2/e20181408>. Accessed 2 December 2018
21. Watkins AJ, Dias I, Tsuru H, et al. Paternal diet programs offspring health through sperm- and seminal plasma-specific pathways in mice. *Proc Natl Acad Sci U S A* 2018;115:10064–10069
22. Stanford KI, Rasmussen M, Baer LA, et al. Paternal exercise improves glucose metabolism in adult offspring. *Diabetes* 2018;67:2530–2540
